# Supplementary material for: Knock-Down of Heterogeneous Nuclear Ribonucleoprotein A1 Results in Neurite Damage, Altered Stress Granule Biology, and Cellular Toxicity in Differentiated Neuronal Cells
Source: eNeuro. 2021 Nov 10;8(6):ENEURO.0350-21.2021. doi: 10.1523/ENEURO.0350-21.2021 (PMC8607908; doi:10.1523/ENEURO.0350-21.2021)
Supplement: Extended Data Figure 2-2 — Significantly enriched GO terms from biological processes grouped into the following categories: RNA metabolism, neuronal function, neurite outgrowth, cell death, and RNP complex. Categories include number of genes (# genes), category, description, false discovery rate (FDR) values, -log(FDR value), genes, p values, and term name. Download Figure 2-2, XLS file. [file enu-eN-NWR-0350-21-s03.xls]

## Sheet: RNA Metabolism
# genes	category	description	FDR value	NEG LOG10(FDR)	genes	p-value	term name
293	GO Process	gene expression	4.62e-15	14.3354	Kat2b|Rpl13|Sp1|Mef2d|Paxip1|Kdm7a|Flii|Brd8|Rpl8|App|Bcas2|Ctcf|Ncoa2|Aplp1|Ik|Khsrp|Rps18|Gabpa|Psen2|Phox2b|Gata2|Atf6b|Hspa8|Rpl19|Prpf8|Pcgf2|Dvl2|Hdac2|Ccdc59|Ccar1|Fstl3|Luc7l3|Gtf2a1|Pnn|Cdca7l|Yy1|Id4|Btf3|Ero1l|Eaf1|Loxl2|Sub1|Eif3e|Eif4a2|Brwd1|Prr13|Denr|Cdc5l|Il33|Taf5|Nab2|Eif4a3|Sf3b1|Ptprn|Ccnt2|Ahctf1|Iars2|Eif3m|Hipk3|Gzf1|Rprd1b|Ccnl1|Trim33|Larp7|Rps3a1|Txn1|Sfpq|Zfp593|Mtf1|M…	2.02e-17	GO.0010467
66	GO Process	translation	1.69e-14	13.7721	Rpl13|Rpl8|Rps18|Rpl19|Eif3e|Eif4a2|Denr|Iars2|Eif3m|Rps3a1|Mrpl33|Rpl6|Rpl28|Rps3|Eif4ebp1|Rpl4|Gemin5|Lars2|Rps29|Rbm3|Rpl21|Rpl37|Rpl10a|Eif4h|Rps23|Secisbp2l|Rpl37a|Rps15|Rpl26|Rpl36|Rps17|Rpl29|Rpl3|Rpl32|Rpl5|Rplp2|Eif1ax|Rpl27|Eif2s2|Rpl23|Rpl23a|Rpl11|Rps8|Rps6|Rps27a|Rpl7a|Rpl38|Rps16|Rpl30|Rpl36a|Rpl9|Rps28|Rpl35a|Rpl39|Rpl22|Rps15a|Uba52|Rpl27a|Wars|Rps24|Rps13|Eif4b|Cpeb2|Rpl14|Rps27|…	8.96e-17	GO.0006412
265	GO Process	regulation of transcription, DNA-templated	6.08e-10	9.2161	Cdc45|Kat2b|Sp1|Mef2d|Itga3|Ifrd1|Paxip1|Kdm7a|Flii|Brd8|Prdx2|App|Hmox1|Ctcf|Ncoa2|Ttc5|Gatad1|Khsrp|Gabpa|Psen2|Phox2b|Strn3|Gata2|Atf6b|Hspa8|Tnip1|Pcgf2|Ywhah|Dvl2|Hdac2|Ccdc59|Ccar1|Fstl3|Ube2b|Trib2|Gtf2a1|Pnn|Nfkbia|Cdca7l|Yy1|Id4|Btf3|Cenpk|Psmc6|Eaf1|Loxl2|Sub1|Brwd1|Prr13|Cdc5l|Rhoq|Il33|Uhrf2|Dkk1|Trim8|Taf5|Nab2|Rnf165|Eif4a3|Ptprn|Ccnt2|Ahctf1|Dcaf6|Grin1|Itga6|Hipk3|Pcna|Gzf1|Rprd1b…	5.97e-12	GO.0006355
74	GO Process	mRNA metabolic process	8e-10	9.09691	Sp1|App|Bcas2|Aplp1|Ik|Khsrp|Hspa8|Prpf8|Luc7l3|Pnn|Samd4|Eif3e|Cdc5l|Eif4a3|Sf3b1|Hipk3|Csde1|Sfpq|Dhx15|Zfp326|Zcchc8|Tra2a|Smg1|Nono|Frg1|Gemin5|Dhx9|Ythdc1|Hnrnpk|Rbm17|Ago2|Hnrnpa1|Thoc2|Sf3b3|Hnrnpu|Cir1|Setx|Luc7l2|Pde12|Patl1|Slbp|Snrpc|Thoc7|Ddx1|Celf1|Snrnp70|Hnrnph1|Prpf4b|Tardbp|Mbnl2|Fmr1|Isy1|Rnpc3|Supt4a|Ago1|Snrnp200|Cnot2|Srsf10|Med1|Trp53|Rbm39|Atf4|Hnrnpc|Hnrnpa3|Fip1l1|Hnrnpa2…	7.96e-12	GO.0016071
52	GO Process	RNA splicing	2.21e-08	7.65561	Bcas2|Ik|Khsrp|Hspa8|Prpf8|Luc7l3|Pnn|Cdc5l|Eif4a3|Sf3b1|Sfpq|Dhx15|Zfp326|Zcchc8|Tra2a|Zfml|Nono|Frg1|Gemin5|Dhx9|Ythdc1|Hnrnpk|Rbm17|Hnrnpa1|Thoc2|Sf3b3|Hnrnpu|Cir1|Setx|Luc7l2|Snrpc|Thoc7|Ddx1|Celf1|Snrnp70|Hnrnph1|Prpf4b|Tardbp|Mbnl2|Fmr1|Isy1|Rnpc3|Snrnp200|Srsf10|Rbm39|Hnrnpc|Hnrnpa3|Hnrnpa2b1|Plrg1|Sf1|Srrm1|Snrpe	2.95e-10	GO.0008380
26	GO Process	RNA transport	0.00013	3.88606	Khsrp|Seh1l|Eif4a3|Ahctf1|Nmd3|Zfp593|Dhx9|Ythdc1|Hnrnpa1|Thoc2|Rftn1|Nup54|Nup133|Slbp|Thoc7|Rps15|Npm1|Fmr1|Nup93|Hnrnpa3|Hnrnpa2b1|Tpr|Mcm3ap|Nup155|Xpo7|Tomm20	3.85e-06	GO.0050658
9	GO Process	spliceosomal complex assembly	0.0315	1.50169	Luc7l3|Sf3b1|Ythdc1|Setx|Luc7l2|Snrpc|Celf1|Isy1|Srsf10	0.0027	GO.0000245

## Sheet: Neuronal Function
# genes	category	description	FDR value	NEG LOG FDR	genes	p-value	term name
49	GO Process	positive regulation of neuron projection development	2.23e-06	5.6517	Actr2|Kat2b|Serpinf1|Itga3|Limk1|Dlg4|Dvl2|Kif3c|Pafah1b1|Dbn1|Ache|Tnfrsf12a|Syt4|Dpysl3|Ehd1|Serpini1|Ntrk1|Rufy3|Ret|Cask|Mecp2|Katnb1|Rpl4|Hnrnpk|Creb3l2|Setx|Nlgn2|Map1b|Tubb2b|Numbl|Ndrg4|Fgfr1|Golga4|Adnp|Fmr1|Itgb1|Arsb|Snap91|Plxnc1|Hspa5|Mapt|Ptn|L1cam|Syt1|Ahi1|Map2k2|Grip1|Metrn|Tenm3	4.07e-08	GO.0010976
78	GO Process	regulation of neuron differentiation	2.44e-05	4.61261	Actr2|Kat2b|Serpinf1|Itga3|Ifrd1|App|Phox2b|Limk1|Gata2|Ctsz|Dlg4|Ywhah|Dvl2|Hdac2|Kif3c|Pafah1b1|Id4|Dbn1|Ache|Tnfrsf12a|Syt4|Cdh2|Dpysl3|Ehd1|Dkk1|Slit1|Itm2c|Grin1|Serpini1|Arhgef2|Ntrk1|Pdlim5|Rufy3|Ret|Cask|Mecp2|Katnb1|Rpl4|BC027231|Hnrnpk|Syne1|Brsk1|Creb3l2|Spag9|Thoc2|Inpp5f|Ttl|Ywhag|Setx|Nlgn2|Ptprs|Map1b|Tubb2b|Numbl|Rest|Ndrg4|Fgfr1|Golga4|Adnp|Fmr1|Itgb1|Arsb|Snap91|Plxnc1|Hspa5|Map…	6.02e-07	GO.0045664
88	GO Process	regulation of neurogenesis	6.22e-05	4.20621	Actr2|Kat2b|Serpinf1|Itga3|Ifrd1|App|Phox2b|Limk1|Gata2|Ctsz|Dlg4|Ywhah|Dvl2|Sema6a|Hdac2|Kif3c|Pafah1b1|Id4|Dbn1|Ache|Tnfrsf12a|Syt4|Cdh2|Dpysl3|Ehd1|Dkk1|Slit1|Itm2c|Grin1|Serpini1|Arhgef2|Ntrk1|Pdlim5|Rufy3|Ret|Cask|Mecp2|Katnb1|Rpl4|BC027231|Hnrnpk|Syne1|Brsk1|Pcm1|Creb3l2|Spag9|Thoc2|Inpp5f|Ttl|Ywhag|Setx|Nlgn2|Lingo1|Ptprs|Hmgb2|Map1b|Tubb2b|Numbl|Rest|Ndrg4|Fgfr1|Golga4|Adnp|Fmr1|Itgb1|Ars…	1.69e-06	GO.0050767
182	GO Process	nervous system development	8.3e-05	4.08092	Actr2|Kat2b|Serpinf1|Mef2d|Itga3|Tulp3|Ifrd1|Kdm7a|Ncan|Ogdh|Plod3|Ndrg1|App|Aplp1|Psen2|Phox2b|Limk1|Gata2|Ctsz|Dlg4|Ywhah|Dvl2|Ubb|Sema6a|Hdac2|Frs2|Rock2|Kif3c|Pafah1b1|Id4|Dbn1|Nptxr|Racgap1|Ache|Tnfrsf12a|Hsp90ab1|Syt4|Cdh2|Bag6|Dpysl3|Ehd1|Il33|Dkk1|Slit1|Nab2|Rnf165|Unc5a|Atic|Abcb6|Itm2c|Gigyf2|Sept2|Uhmk1|Grin1|Nckap1|Serpini1|Arhgef2|Ntrk1|Bcl10|Pdlim5|Slc2a1|Stmn1|Mxra8|Rufy3|Ret|Tpp1|…	2.34e-06	GO.0007399
29	GO Process	regulation of synapse structure or activity	0.00036	3.4437	Actr2|Ncan|App|Pafah1b1|Dbn1|Cdh2|Dkk1|Slit1|Grin1|Ntrk1|Pdlim5|Cask|Mecp2|Hnrnpk|Lrrn3|Nlgn2|Lrrc4b|Lrrc24|Shisa7|Homer1|Adnp|Fmr1|Prnp|Mesdc2|Snap91|Ptn|Stx1b|Lphn1|Ssh1	1.24e-05	GO.0050803
6	GO Process	regulation of postsynaptic membrane organization	0.0111	1.95468	Dbn1|Cdh2|Shisa7|Mesdc2|Ptn|Ssh1	0.00076	GO.1901626
7	GO Process	negative regulation of neurotransmitter transport	0.0237	1.62525	Syt4|Gabbr1|Slc30a1|Abat|Rap1b|Fmr1|Nos1	0.0019	GO.0051589

## Sheet: Neurite Outgrowth
# genes	category	description	FDR value	NEG LOG FDR	genes	p-value	term name
57	GO Process	positive regulation of cell projection organization	5.84e-06	5.23359	Actr2|Kat2b|Serpinf1|Itga3|Limk1|Dlg4|Dvl2|Kif3c|Pafah1b1|Dbn1|Ache|Tnfrsf12a|Rhoq|Syt4|Dpysl3|Ehd1|Grin1|Nckap1|Serpini1|Ntrk1|Rufy3|Fscn1|Ret|Nav3|Cask|Mecp2|Katnb1|Rpl4|Hnrnpk|Creb3l2|Brk1|Anln|Setx|Nlgn2|Map1b|Tubb2b|Numbl|Ndrg4|Fgfr1|Golga4|Adnp|Fmr1|Itgb1|Arsb|Snap91|Plxnc1|Hspa5|Mapt|Ptn|L1cam|Syt1|Ahi1|Atmin|Map2k2|Grip1|Metrn|Tenm3	1.19e-07	GO.0031346
61	GO Process	regulation of cytoskeleton organization	6.95e-06	5.15802	Actr2|Rdx|Kat2b|Kif11|Limk1|Hdac2|Rock2|Itgb3|Pafah1b1|Dbn1|Twf1|Pdgfrb|Arl2|Smc3|Nckap1|Mapre1|Arhgef2|Stmn1|Fscn1|Nav3|Rps3|Arhgap6|Mecp2|Katnb1|Pik3r2|Cyld|Arhgef10l|Brk1|Smc1a|Bag4|Arhgap18|Spag5|Hnrnpu|Ptger4|Trim37|Spire1|Gas2l1|Baiap2l1|Pik3r1|Abi2|Stag2|Map1b|Capn2|Jmy|Tmod3|Stmn4|Npm1|Numa1|Map9|Map1a|Mapt|Tbcd|Cltc|Sptbn1|Capza1|ENSMUSP00000103762|Cep250|Taok2|Tpr|Ssh1|Chek1	1.48e-07	GO.0051493
66	GO Process	regulation of neuron projection development	8.87e-06	5.05208	Actr2|Kat2b|Serpinf1|Itga3|Ifrd1|Limk1|Ctsz|Dlg4|Ywhah|Dvl2|Hdac2|Kif3c|Pafah1b1|Dbn1|Ache|Tnfrsf12a|Syt4|Cdh2|Dpysl3|Ehd1|Slit1|Itm2c|Grin1|Serpini1|Ntrk1|Pdlim5|Rufy3|Ret|Cask|Mecp2|Katnb1|Rpl4|Hnrnpk|Syne1|Brsk1|Creb3l2|Thoc2|Inpp5f|Ttl|Setx|Nlgn2|Ptprs|Map1b|Tubb2b|Numbl|Ndrg4|Fgfr1|Golga4|Adnp|Fmr1|Itgb1|Arsb|Snap91|Plxnc1|Hspa5|Mapt|Ptn|L1cam|Syt1|Ahi1|Stx1b|Map2k2|Grip1|Ssh1|Metrn|Tenm3	1.96e-07	GO.0010975
273	GO Process	cell differentiation	1.7e-05	4.76955	Actr2|Gna12|Rdx|Kat2b|Serpinf1|Araf|Sp1|Mef2d|Itga3|Tulp3|Fxr1|Ifrd1|Paxip1|Ogdh|G6pdx|Gab2|Plod3|Ndrg1|App|Bcl2l1|Psen2|Phox2b|Limk1|Gata2|Ctsz|Dlg4|Ywhah|Dvl2|Ubb|Sema6a|Hdac2|Cdk1|Dusp6|Herc4|Lgr5|Frs2|Fstl3|Ube2b|Rock2|Sdc1|Kif3c|Itgb3|Pafah1b1|Yy1|Id4|Dbn1|Ero1l|Esco2|Loxl2|Bmp1|Nptxr|Itga5|Racgap1|Ache|Tnfrsf12a|Gpr115|Cdc5l|Hsp90ab1|Syt4|Cdh2|Bag6|Gabbr1|Dpysl3|Pdgfrb|Ehd1|Il33|Uhrf2|Dkk1|…	4.03e-07	GO.0030154
26	GO Process	regulation of axonogenesis	0.0014	2.85387	Ifrd1|Limk1|Pafah1b1|Dbn1|Ache|Tnfrsf12a|Cdh2|Slit1|Grin1|Rufy3|Ret|Rpl4|Brsk1|Ttl|Ptprs|Map1b|Tubb2b|Golga4|Adnp|Snap91|Plxnc1|Mapt|L1cam|Map2k2|Ssh1|Metrn	6.61e-05	GO.0050770
43	GO Process	microtubule cytoskeleton organization	0.0049	2.3098	Kif11|Tppp3|Cdk1|Ube2b|Rock2|Pafah1b1|Racgap1|Arl2|Kif3b|Arhgef2|Lmna|Stmn1|Tuba8|Asun|Rps3|Mecp2|Katnb1|Brsk1|Pcm1|Katnal1|Spag5|Ttl|Spire1|Gas2l1|Vamp4|Ino80|Zfp207|Nav1|Map1b|Ncor1|Stmn4|Npm1|Birc5|Numa1|Ccser2|Map9|Pard6a|Map1a|Mapt|Tbcd|Cltc|Cep250|Setd2	0.00028	GO.0000226
11	GO Process	positive regulation of axon extension	0.0074	2.13077	Limk1|Pafah1b1|Dbn1|Tnfrsf12a|Rufy3|Rpl4|Map1b|Golga4|Adnp|Mapt|L1cam	0.00047	GO.0045773
4	GO Process	neuron projection maintenance	0.0363	1.44009	App|Prnp|Map1a|Atp1a3	0.0032	GO.1990535

## Sheet: Cell Death
# genes	category	description	FDR value	NEG LOG10 (FDR)	genes	p-value	term name
152	GO Process	regulation of cell death	3.51e-06	5.45469	Serpinf1|Araf|Bdkrb2|Map3k3|Ier3|Fam162a|G6pdx|Prdx2|Hmox1|Bcl2l1|Psen2|Pea15a|Gata2|Hspa8|Fnta|Ctsz|Cd274|Traf4|Atad5|Serinc3|Pcgf2|Ywhah|Ubb|Hdac2|Cdk1|Dusp6|Ccar1|Frs2|Txnrd1|Ccng1|Ube2b|Itgb3|Chga|Trim35|Bnip3l|Itga5|Sdf2l1|Tnfrsf12a|Hsp90ab1|Bag6|Pdgfrb|Tmem132a|Dkk1|P4hb|Hspd1|Slc39a10|Itm2c|Grin1|Itga6|Hipk3|Zmat3|Anxa5|Slc25a24|Lmna|Ntrk1|Rps3a1|Bcl10|Ndufaf4|Txn1|Sfpq|Ing3|Trim24|Ret|Rps…	6.9e-08	GO.0010941
137	GO Process	regulation of apoptotic process	1.3e-05	4.88606	Araf|Bdkrb2|Map3k3|Ier3|Fam162a|G6pdx|Prdx2|Hmox1|Bcl2l1|Psen2|Pea15a|Gata2|Hspa8|Fnta|Ctsz|Cd274|Traf4|Atad5|Serinc3|Pcgf2|Ywhah|Ubb|Hdac2|Cdk1|Dusp6|Ccar1|Frs2|Ccng1|Ube2b|Trim35|Bnip3l|Itga5|Sdf2l1|Tnfrsf12a|Hsp90ab1|Bag6|Pdgfrb|Dkk1|P4hb|Hspd1|Slc39a10|Itm2c|Grin1|Itga6|Hipk3|Zmat3|Anxa5|Lmna|Ntrk1|Rps3a1|Bcl10|Ndufaf4|Sfpq|Ing3|Trim24|Ret|Rps3|Rps6ka3|Nono|Mecp2|Slc25a4|Nae1|Phip|Dstyk|Gabrb…	3.04e-07	GO.0042981
138	GO Process	regulation of programmed cell death	1.55e-05	4.80967	Araf|Bdkrb2|Map3k3|Ier3|Fam162a|G6pdx|Prdx2|Hmox1|Bcl2l1|Psen2|Pea15a|Gata2|Hspa8|Fnta|Ctsz|Cd274|Traf4|Atad5|Serinc3|Pcgf2|Ywhah|Ubb|Hdac2|Cdk1|Dusp6|Ccar1|Frs2|Ccng1|Ube2b|Trim35|Bnip3l|Itga5|Sdf2l1|Tnfrsf12a|Hsp90ab1|Bag6|Pdgfrb|Tmem132a|Dkk1|P4hb|Hspd1|Slc39a10|Itm2c|Grin1|Itga6|Hipk3|Zmat3|Anxa5|Lmna|Ntrk1|Rps3a1|Bcl10|Ndufaf4|Sfpq|Ing3|Trim24|Ret|Rps3|Rps6ka3|Nono|Mecp2|Slc25a4|Nae1|Phip|Ds…	3.65e-07	GO.0043067
48	GO Process	regulation of apoptotic signaling pathway	0.00032	3.49485	Bdkrb2|Ier3|Fam162a|Prdx2|Hmox1|Bcl2l1|Psen2|Pea15a|Atad5|Serinc3|Pcgf2|Ubb|Hdac2|Tnfrsf12a|P4hb|Itm2c|Itga6|Lmna|Bcl10|Sfpq|Ret|Rps3|Nono|Phip|Ppp1ca|Hnrnpk|Cyld|Xbp1|Higd1a|Scg2|Hmgb2|Hyou1|Rpl26|Unc5b|Fgfr1|Pml|Deptor|Cd74|Vimp|Rpl11|Bnip3|Usp47|Trp53|Atf4|Tpt1|Cth|Pdcd5|Noc2l	1.08e-05	GO.2001233
23	GO Process	regulation of intrinsic apoptotic signaling pathway	0.0037	2.4318	Bdkrb2|Bcl2l1|Atad5|Serinc3|Ubb|Hdac2|P4hb|Sfpq|Rps3|Nono|Hnrnpk|Cyld|Xbp1|Hyou1|Rpl26|Cd74|Vimp|Rpl11|Usp47|Trp53|Atf4|Tpt1|Noc2l	0.00021	GO.2001242
8	GO Process	regulation of intrinsic apoptotic signaling pathway by p53 class mediator	0.0098	2.00877	Bdkrb2|Atad5|Ubb|Hnrnpk|Rpl26|Cd74|Rpl11|Trp53	0.00066	GO.1902253
8	GO Process	regulation of intrinsic apoptotic signaling pathway in response to DNA damage	0.0275	1.56067	Bcl2l1|Atad5|Rps3|Hnrnpk|Rpl26|Cd74|Usp47|Tpt1	0.0022	GO.1902229
35	GO Process	regulation of neuron death	0.0315	1.50169	Serpinf1|G6pdx|Prdx2|Hmox1|Bcl2l1|Ctsz|Ubb|Chga|Hsp90ab1|Hspd1|Grin1|Ntrk1|Nono|Mecp2|Nae1|Gabrb3|F2r|Ncoa7|Hyou1|Egr1|Dnajc5|Npm1|Unc5b|Birc5|Adnp|Fmr1|Prnp|Abcc1|Mapt|Nos1|Pdpk1|Trp53|Atf4|Atm|Ssh1	0.0027	GO.1901214
20	GO Process	regulation of extrinsic apoptotic signaling pathway	0.0352	1.45346	Prdx2|Hmox1|Bcl2l1|Psen2|Pea15a|Tnfrsf12a|Itm2c|Itga6|Lmna|Bcl10|Ret|Phip|Ppp1ca|Cyld|Scg2|Hmgb2|Unc5b|Fgfr1|Pml|Deptor	0.0031	GO.2001236
9	GO Process	neuron apoptotic process	0.042	1.37675	Fam162a|App|Bcl2l1|Nae1|Hspa5|Pigt|Bnip3|Trp53|Atm	0.0039	GO.0051402

## Sheet: RNP Complex
# genes	category	description	FDR value	NEG LOG10 (FDR)	genes	p-value	term name
59	GO Process	ribonucleoprotein complex biogenesis	2.1e-08	7.67778	Rps18|Prpf8|Luc7l3|Denr|Hsp90ab1|Eif4a3|Sf3b1|Nmd3|Zfp593|Rpl6|Frg1|Ipo4|Gemin5|Dhx9|Nop14|Ythdc1|Ago2|Rpl10a|Eif4h|Ptges3|Setx|Utp14b|Rps23|Luc7l2|Rrp1|Patl1|Snrpc|Rps15|Celf1|Rpl26|Npm1|Rps25|Rps17|Rpl3|Rpl5|Lyar|Isy1|Rpl27|Ago1|Rpl23a|Rpl11|Rps8|Rps6|Rpl7a|Srsf10|Rpl38|ENSMUSP00000103762|Rps16|Rps28|Rps10|Rpl35a|Lsg1|Rps24|Eif4b|Snrpe|Rpl14|Rps27|Noc2l|Nop58	2.78e-10	GO.0022613
145	GO Process	protein-containing complex subunit organization	1.3e-07	6.88606	Cdc45|Plod3|App|Hmox1|Ctcf|P4ha1|Tppp3|Hspa8|Prpf8|Dlg4|Dvl2|Cdk1|Mcu|Txnrd1|Pfkl|Rrm2|Luc7l3|Uqcrb|Cenpk|Loxl2|Sub1|Derl1|Ndufa5|Denr|Ache|Hsp90ab1|Cdh2|Dpysl3|Seh1l|Ehd1|Shmt2|Sf3b1|Coa5|Sept2|Ahctf1|Stom|Grin1|Anxa5|Bcl10|Ndufaf4|Slc2a1|Stmn1|Rpl6|Tmem170|Anxa2|Pkm|Me1|Prkar2a|Ipo4|Gemin5|Tmed10|Dhx9|Tbca|Atg14|Ythdc1|Cyld|Brk1|Lonp1|Ago2|Spag9|Ptma|Smarca5|Hist1h1d|Fermt2|Bag4|Atp6v0a1|Acsl3|…	2.01e-09	GO.0043933
128	GO Process	protein-containing complex assembly	1.62e-06	5.79048	Cdc45|App|Hmox1|Tppp3|Prpf8|Dlg4|Dvl2|Cdk1|Mcu|Txnrd1|Pfkl|Rrm2|Luc7l3|Uqcrb|Cenpk|Sub1|Derl1|Ndufa5|Denr|Ache|Hsp90ab1|Cdh2|Dpysl3|Ehd1|Shmt2|Sf3b1|Coa5|Sept2|Ahctf1|Stom|Grin1|Anxa5|Bcl10|Ndufaf4|Slc2a1|Rpl6|Tmem170|Anxa2|Pkm|Me1|Prkar2a|Ipo4|Gemin5|Tmed10|Dhx9|Tbca|Ythdc1|Cyld|Brk1|Lonp1|Ago2|Spag9|Smarca5|Hist1h1d|Fermt2|Bag4|Atp6v0a1|Acsl3|Nup54|Kcnh2|Eif4h|Ptges3|Setx|Vamp4|Amfr|Zfp207|Rps2…	2.86e-08	GO.0065003
35	GO Process	ribonucleoprotein complex assembly	2.17e-06	5.66354	Prpf8|Luc7l3|Denr|Hsp90ab1|Sf3b1|Rpl6|Gemin5|Dhx9|Ythdc1|Ago2|Eif4h|Ptges3|Setx|Rps23|Luc7l2|Patl1|Snrpc|Rps15|Celf1|Rps25|Rps17|Rpl3|Rpl5|Isy1|Ago1|Rpl23a|Rpl11|Srsf10|Rpl38|ENSMUSP00000103762|Rps28|Rps10|Eif4b|Snrpe|Rps27	3.93e-08	GO.0022618
51	GO Process	regulation of protein complex assembly	7.31e-05	4.13608	Actr2|Rdx|Paxip1|Psen2|Dbn1|Psmc6|Sub1|Twf1|Dkk1|Arl2|Nckap1|Mapre1|Arhgef2|Stmn1|Psmc2|Fscn1|Nav3|Rps3|Mecp2|Eif4ebp1|Pik3r2|BC018507|Spidr|Brk1|Bag4|Arhgap18|Ptger4|Fnip1|Spire1|Setx|Baiap2l1|Abi2|Insig1|Map1b|Jmy|Tmod3|Numa1|Hmgb1|Snap91|Mapt|Tbcd|Sptbn1|Cnot2|Stx1b|Capza1|Trp53|Atm|Cnot6|Ide|Wars|Birc2	2.03e-06	GO.0043254
12	GO Process	ribonucleoprotein complex export from nucleus	0.0118	1.92812	Nmd3|Zfp593|Ythdc1|Thoc2|Nup133|Thoc7|Rps15|Npm1|Nup93|Hnrnpa2b1|Tpr|Nup155	0.00082	GO.0071426
15	GO Process	regulation of protein complex disassembly	0.0275	1.56067	Rdx|Twf1|Mgea5|Arhgef2|Nav3|Katnb1|Gas2l1|Setx|Clec16a|Map1b|Tmod3|Map1a|Sptbn1|Bnip3|Capza1	0.0022	GO.0043244
